# Supplementary material
Source: PubMed Central journal article supplement (PMC5773971)
Supplement: BPH-175-544-s001.pdf [file BPH-175-544-s001.pdf]

## Supporting Information

*Xenopus* GLP-1 derived and PEGylated GLP-1 receptor agonists: long-acting hypoglycemic and insulinotropic activities with potential therapeutic utilities

Jing Han,<sup>\*</sup> Yingying Fei, Feng Zhou, Xinyu Chen, Ying Zhang, Lin Liu, Junjie Fu<sup>\*\*</sup>

### Table of contents

|                                                                                       |     |
|---------------------------------------------------------------------------------------|-----|
| Characterization of peptides <b>1-20</b> .....                                        | S1  |
| Characterization of xGLP-1B-Sen and peptides <b>21-24</b> .....                       | S12 |
| Characterization of PEGylated conjugates <b>25-36</b> .....                           | S15 |
| Representative concentration response curves of hGLP-1 and PEGylated conjugates ..... | S27 |
| Time table of in vivo IPGTT and OGTT tests .....                                      | S28 |

# Supporting Information

## Characterization of peptides 1–20

1

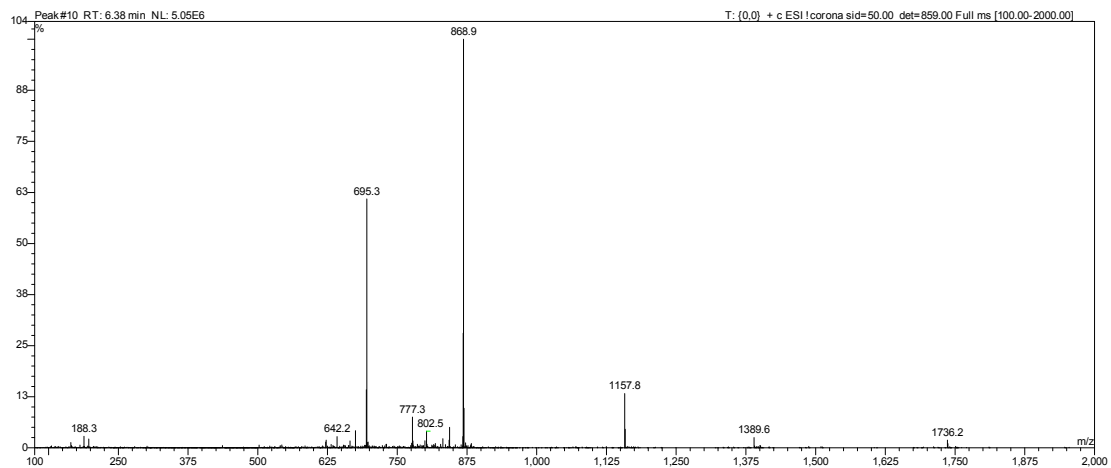

| (m/z)calad                 | (m/z)found                 |
|----------------------------|----------------------------|
| [m+4H] <sup>4+</sup> 868.5 | [m+4H] <sup>4+</sup> 868.9 |
| [M+5H] <sup>5+</sup> 695.0 | [M+5H] <sup>5+</sup> 695.3 |

2

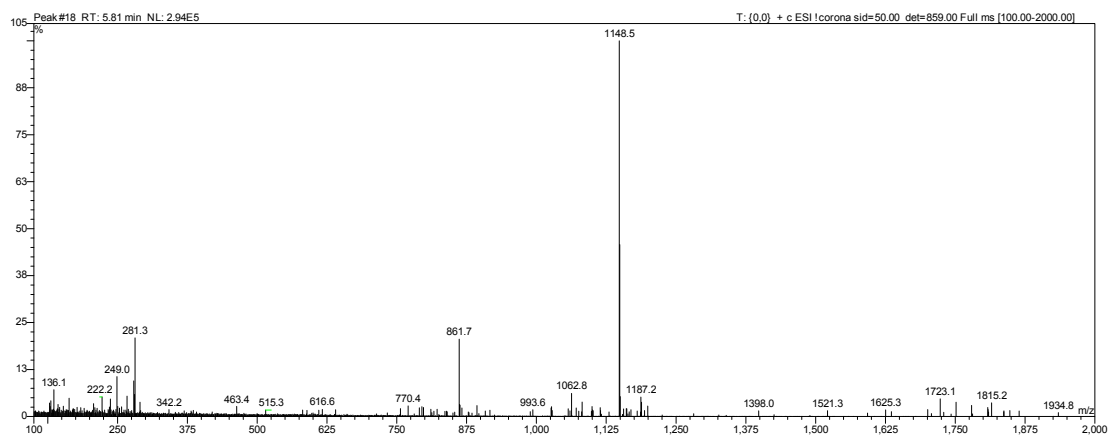

| (m/z)calad                  | (m/z)found                  |
|-----------------------------|-----------------------------|
| [m+3H] <sup>3+</sup> 1148.3 | [m+3H] <sup>3+</sup> 1148.5 |
| [m+4H] <sup>4+</sup> 861.4  | [m+4H] <sup>4+</sup> 861.7  |

# Supporting Information

## 3

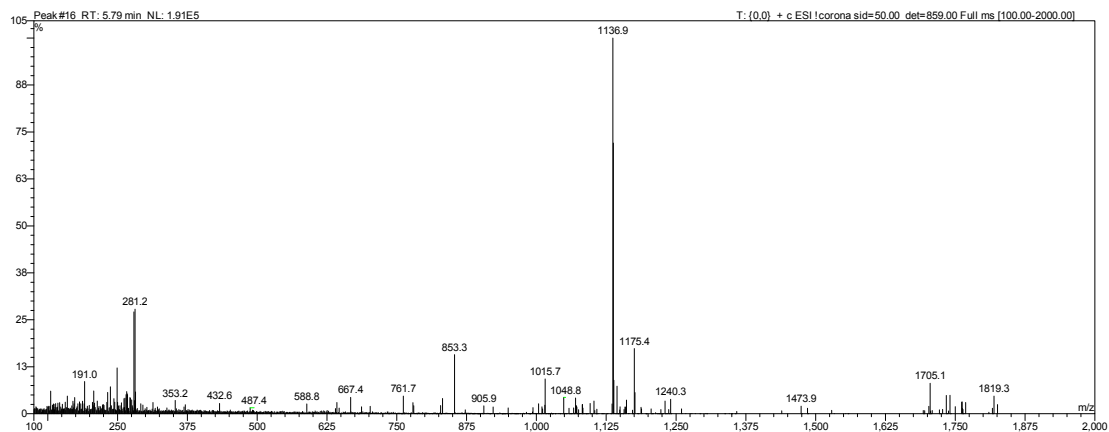

| (m/z)calad                  | (m/z)found                  |
|-----------------------------|-----------------------------|
| [m+3H] <sup>5+</sup> 1136.9 | [m+3H] <sup>3+</sup> 1136.9 |
| [m+4H] <sup>4+</sup> 852.9  | [m+4H] <sup>4+</sup> 853.3  |

## 4

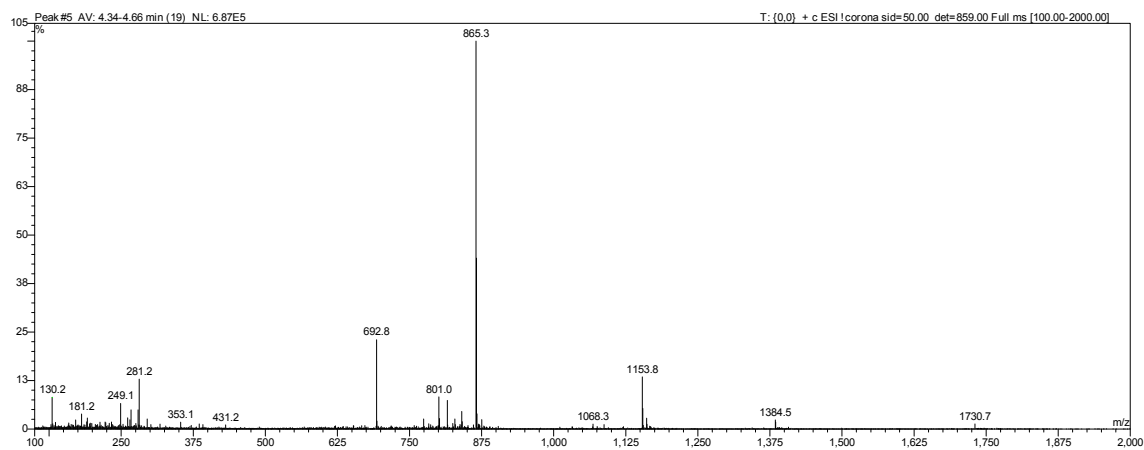

| (m/z)calad                 | (m/z)found                 |
|----------------------------|----------------------------|
| [m+4H] <sup>4+</sup> 865.4 | [m+4H] <sup>4+</sup> 865.3 |
| [m+5H] <sup>5+</sup> 692.5 | [m+5H] <sup>5+</sup> 692.8 |

# Supporting Information

5

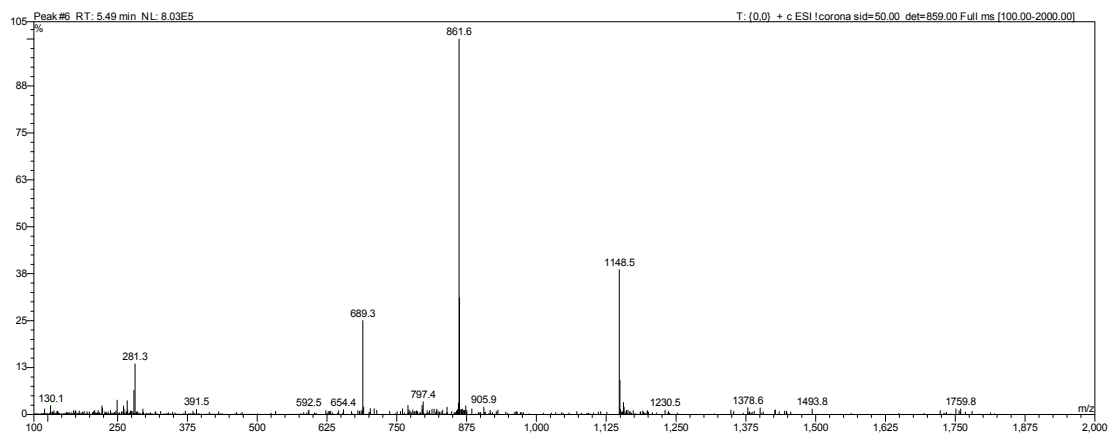

| (m/z)calad                 | (m/z)found                 |
|----------------------------|----------------------------|
| [m+4H] <sup>4+</sup> 861.5 | [m+4H] <sup>4+</sup> 861.6 |
| [m+5H] <sup>5+</sup> 689.4 | [m+5H] <sup>5+</sup> 689.3 |

6

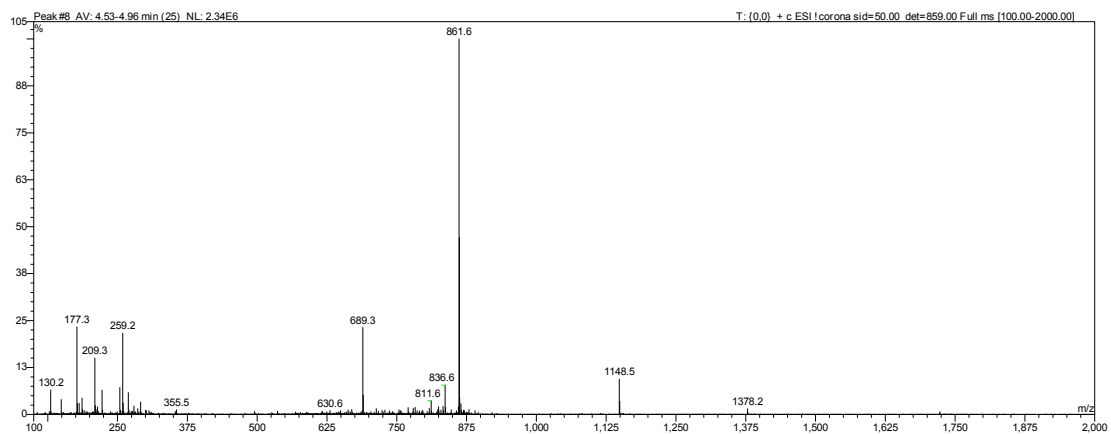

| (m/z)calad                 | (m/z)found                 |
|----------------------------|----------------------------|
| [m+4H] <sup>4+</sup> 861.5 | [m+4H] <sup>4+</sup> 861.6 |
| [m+5H] <sup>5+</sup> 689.4 | [m+5H] <sup>5+</sup> 689.3 |

# Supporting Information

7

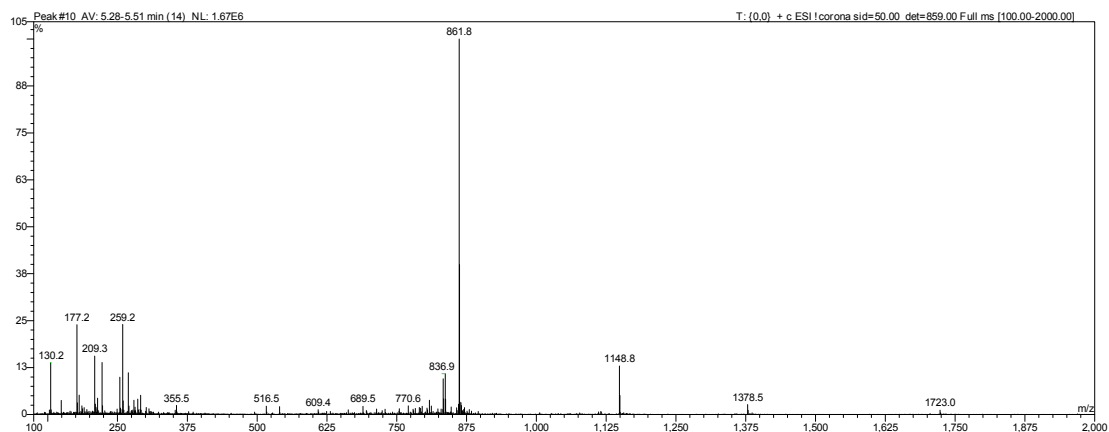

| (m/z)calad                  | (m/z)found                  |
|-----------------------------|-----------------------------|
| [m+3H] <sup>3+</sup> 1148.6 | [m+3H] <sup>3+</sup> 1148.8 |
| [m+4H] <sup>4+</sup> 861.7  | [m+4H] <sup>4+</sup> 861.8  |

8

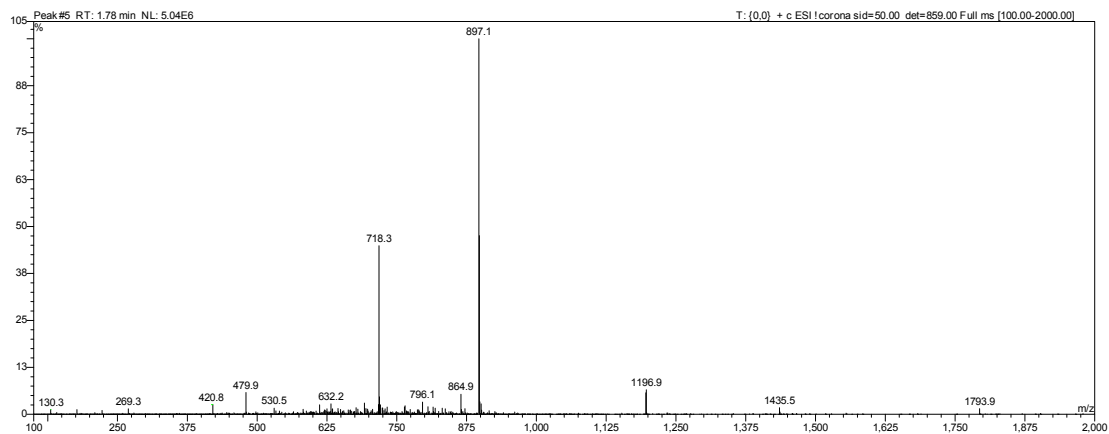

| (m/z)calad                 | (m/z)found                 |
|----------------------------|----------------------------|
| [m+4H] <sup>4+</sup> 897.3 | [m+4H] <sup>4+</sup> 897.1 |
| [m+5H] <sup>5+</sup> 718.0 | [m+5H] <sup>5+</sup> 718.3 |

# Supporting Information

## 10

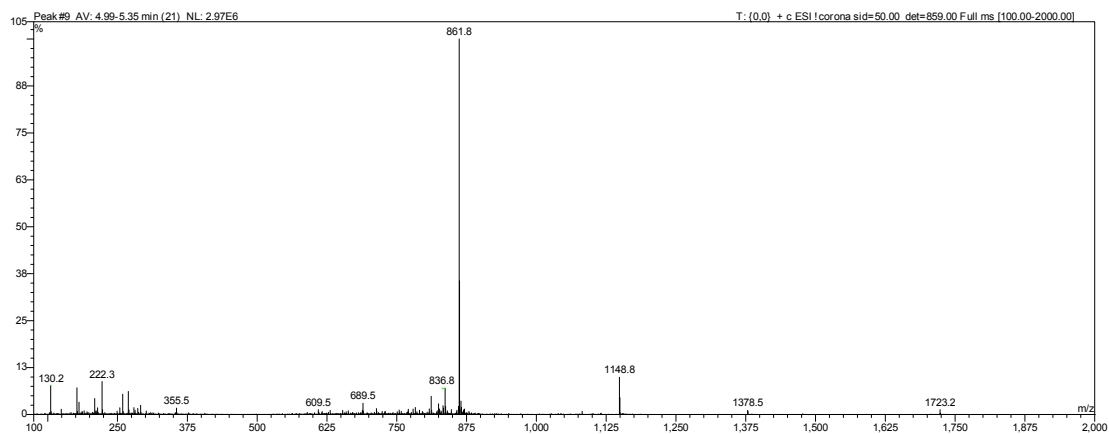

| (m/z)calad           | (m/z)found           |
|----------------------|----------------------|
| $[m+3H]^{3+} 1148.6$ | $[m+3H]^{3+} 1148.8$ |
| $[m+4H]^{4+} 861.7$  | $[m+4H]^{4+} 861.8$  |

## 11

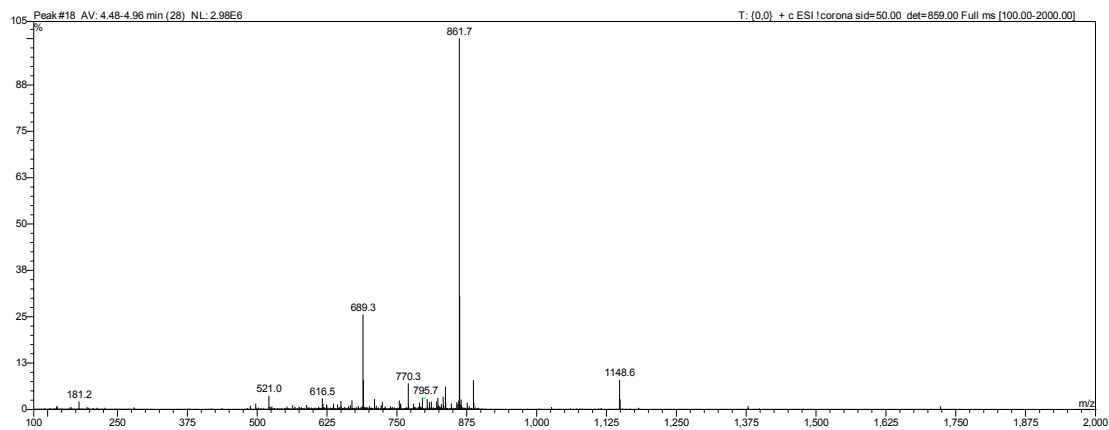

| (m/z)calad          | (m/z)found          |
|---------------------|---------------------|
| $[m+4H]^{4+} 861.5$ | $[m+4H]^{4+} 861.7$ |
| $[m+5H]^{5+} 689.4$ | $[m+5H]^{5+} 689.3$ |

# Supporting Information

## 12

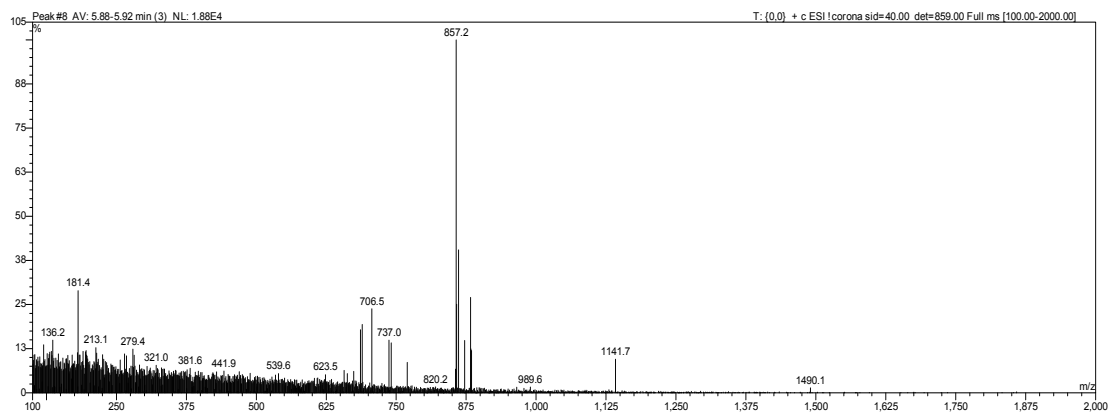

| (m/z)calad           | (m/z)found           |
|----------------------|----------------------|
| $[m+3H]^{3+}$ 1142.3 | $[m+3H]^{3+}$ 1141.7 |
| $[m+4H]^{4+}$ 857.0  | $[m+4H]^{4+}$ 857.2  |

## 13

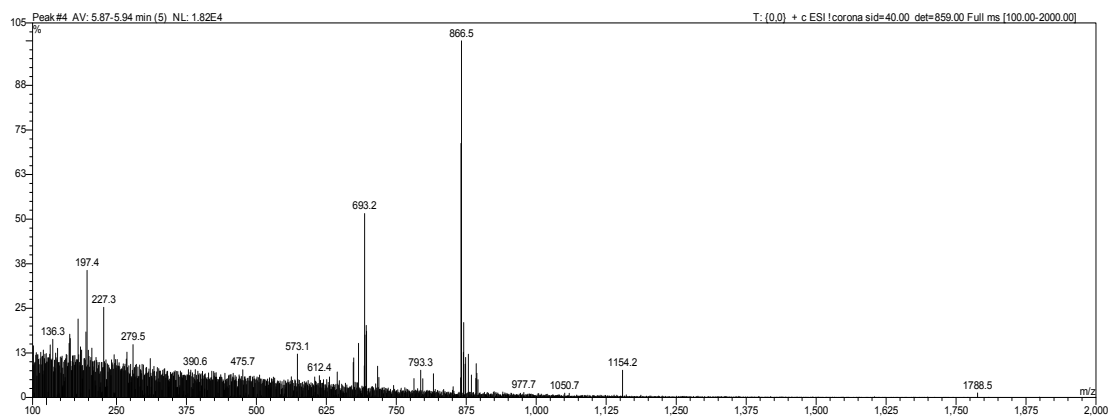

| (m/z)calad          | (m/z)found          |
|---------------------|---------------------|
| $[m+4H]^{4+}$ 865.5 | $[m+4H]^{4+}$ 866.5 |
| $[m+5H]^{5+}$ 692.6 | $[m+5H]^{5+}$ 693.2 |

# Supporting Information

14

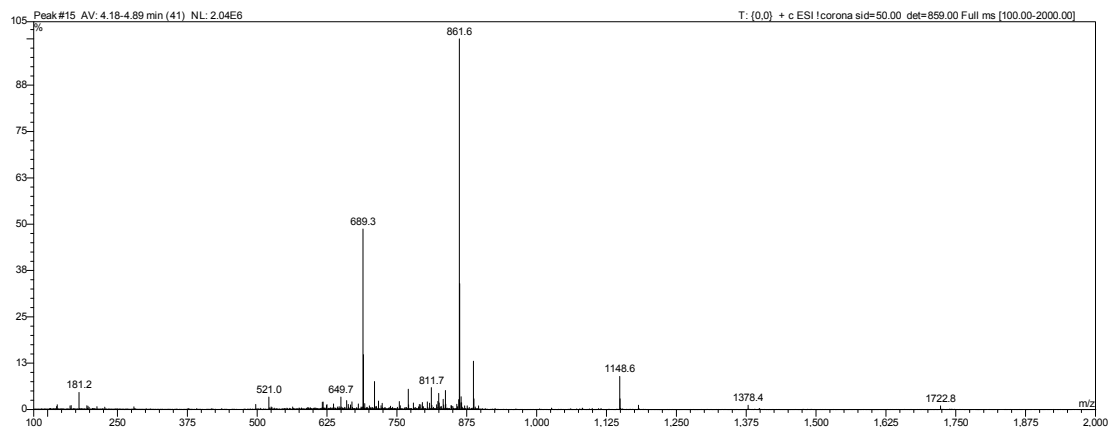

| (m/z)calad          | (m/z)found          |
|---------------------|---------------------|
| $[m+4H]^{4+} 861.5$ | $[m+4H]^{4+} 861.6$ |
| $[m+5H]^{5+} 689.4$ | $[m+5H]^{5+} 689.3$ |

15

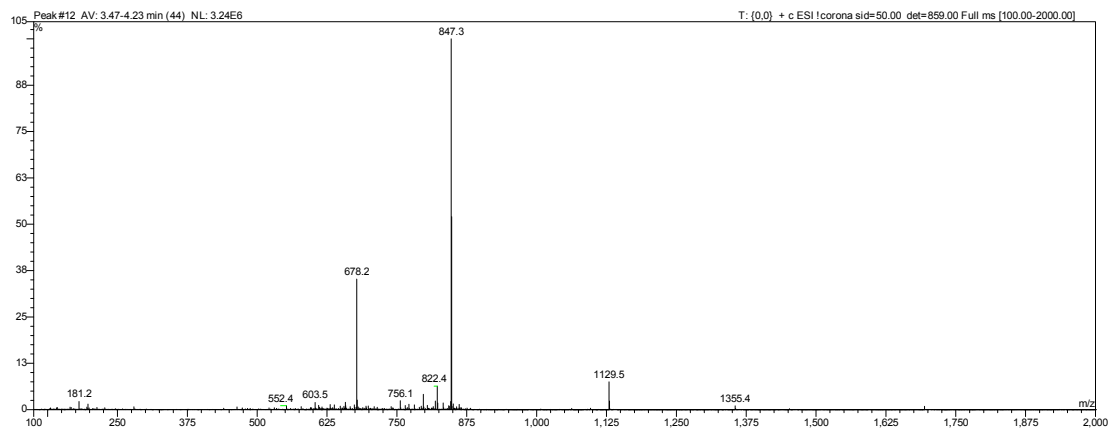

| (m/z)calad          | (m/z)found          |
|---------------------|---------------------|
| $[m+4H]^{4+} 847.2$ | $[m+4H]^{4+} 847.3$ |
| $[m+5H]^{5+} 678.0$ | $[m+5H]^{5+} 678.2$ |



# Supporting Information

## 16

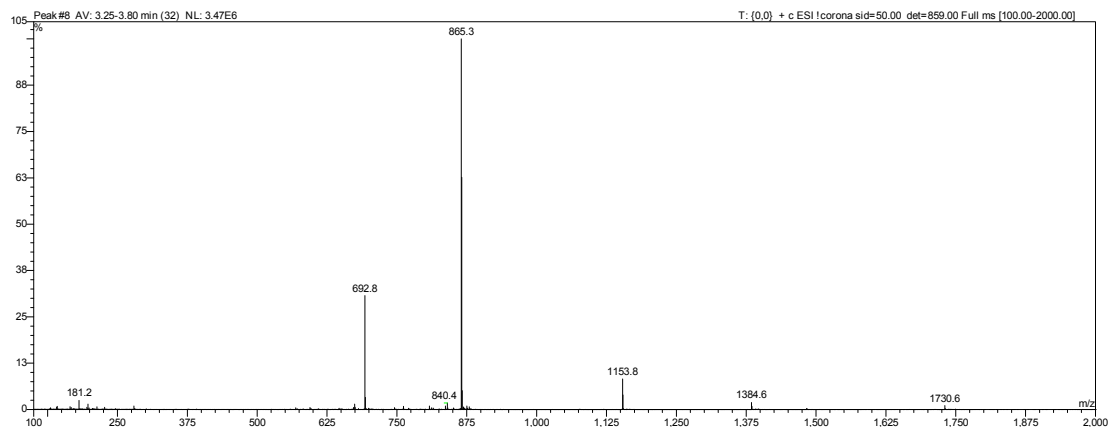

| (m/z)calad          | (m/z)found          |
|---------------------|---------------------|
| $[m+4H]^{4+}$ 865.5 | $[m+4H]^{4+}$ 865.3 |
| $[m+5H]^{5+}$ 692.6 | $[m+5H]^{5+}$ 692.8 |

## 17

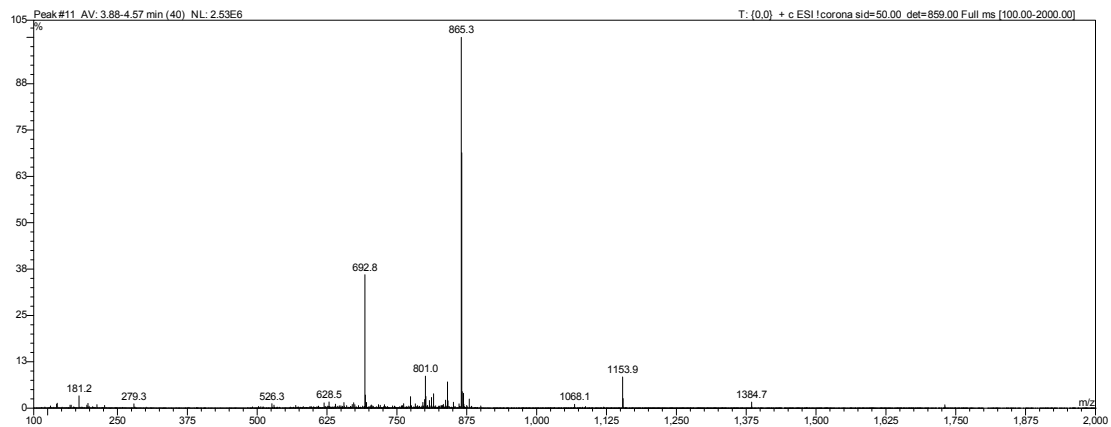

| (m/z)calad          | (m/z)found          |
|---------------------|---------------------|
| $[m+4H]^{4+}$ 865.5 | $[m+4H]^{4+}$ 865.3 |
| $[m+5H]^{5+}$ 692.6 | $[m+5H]^{5+}$ 692.8 |

# Supporting Information

## 18

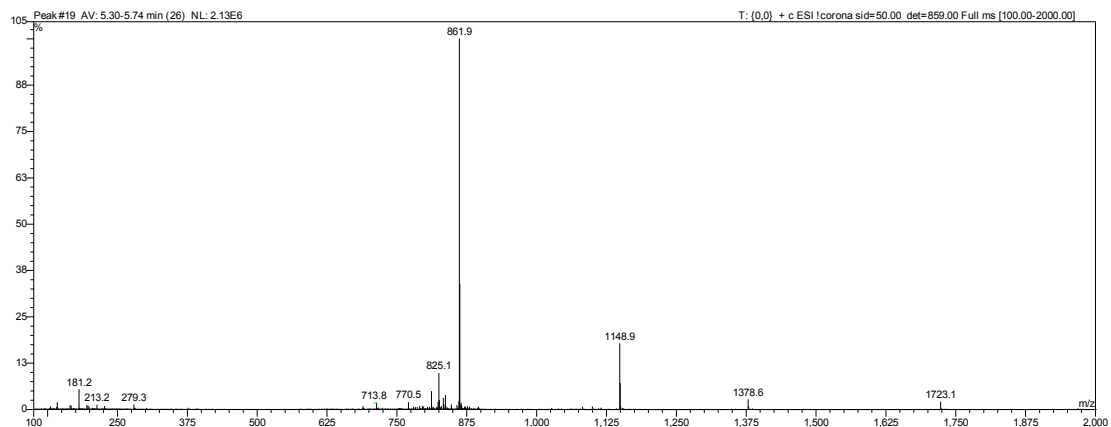

| (m/z)calad           | (m/z)found           |
|----------------------|----------------------|
| $[m+3H]^{3+}$ 1148.6 | $[m+3H]^{3+}$ 1148.9 |
| $[m+4H]^{4+}$ 861.7  | $[m+4H]^{4+}$ 861.9  |

## 19

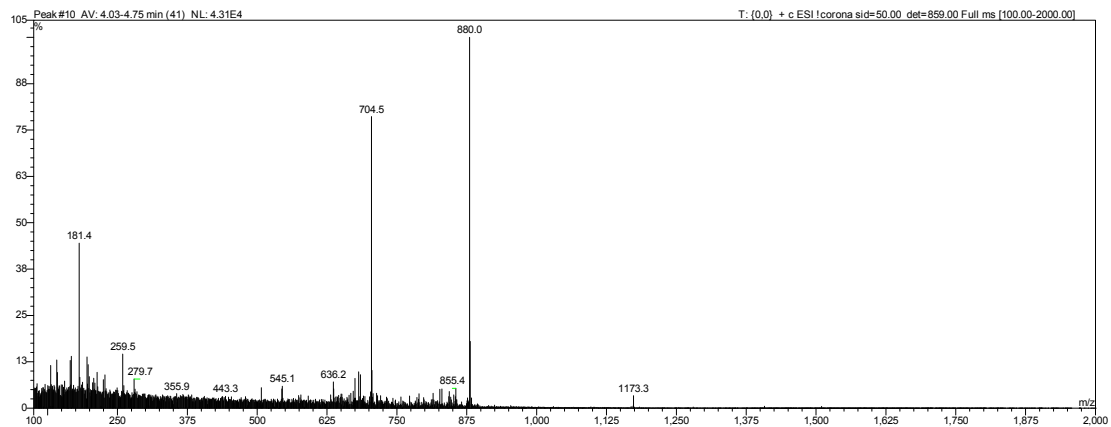

| (m/z)calad          | (m/z)found          |
|---------------------|---------------------|
| $[m+4H]^{4+}$ 879.5 | $[m+4H]^{4+}$ 880.0 |
| $[m+5H]^{5+}$ 703.8 | $[m+5H]^{5+}$ 704.5 |

# Supporting Information

20

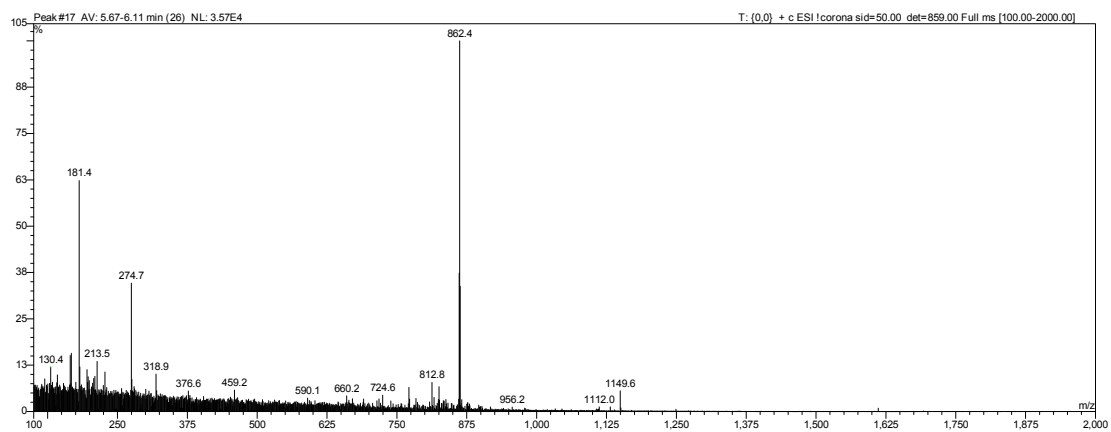

| (m/z)calad           | (m/z)found           |
|----------------------|----------------------|
| $[m+3H]^{3+}$ 1148.6 | $[m+3H]^{3+}$ 1149.6 |
| $[m+4H]^{4+}$ 861.7  | $[m+4H]^{4+}$ 862.4  |

## Supporting Information

### Characterization of xGLP-1B-Sen and peptides 21–24

#### xGLP-1B-Sen

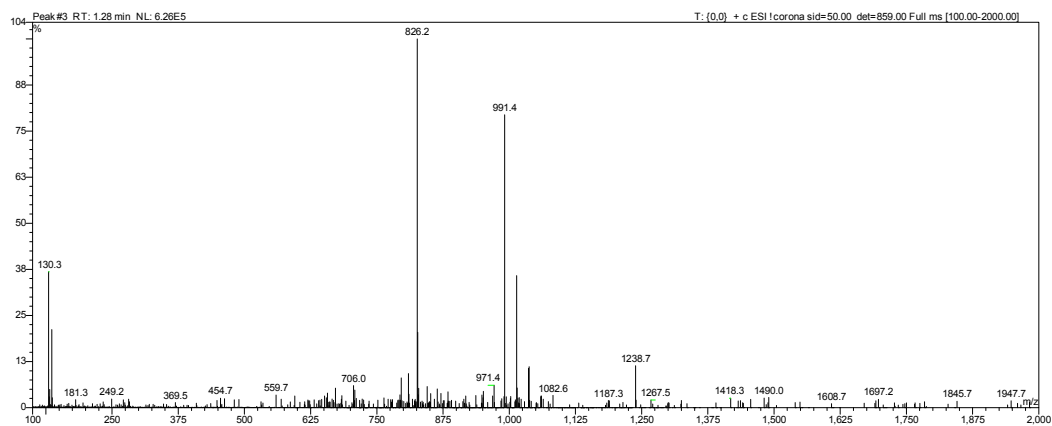

| (m/z)calad                 | (m/z)found                 |
|----------------------------|----------------------------|
| [m+5H] <sup>5+</sup> 990.9 | [m+5H] <sup>5+</sup> 991.4 |
| [m+6H] <sup>6+</sup> 826.0 | [m+6H] <sup>6+</sup> 826.2 |

#### 21

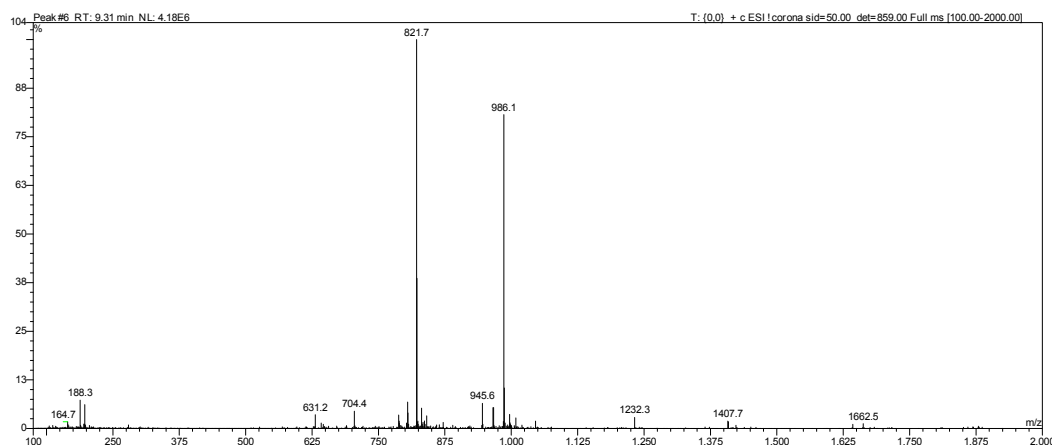

| (m/z)calad                 | (m/z)found                 |
|----------------------------|----------------------------|
| [M+5H] <sup>5+</sup> 985.7 | [M+5H] <sup>5+</sup> 986.1 |
| [M+6H] <sup>6+</sup> 821.6 | [M+6H] <sup>6+</sup> 821.7 |

# Supporting Information

22

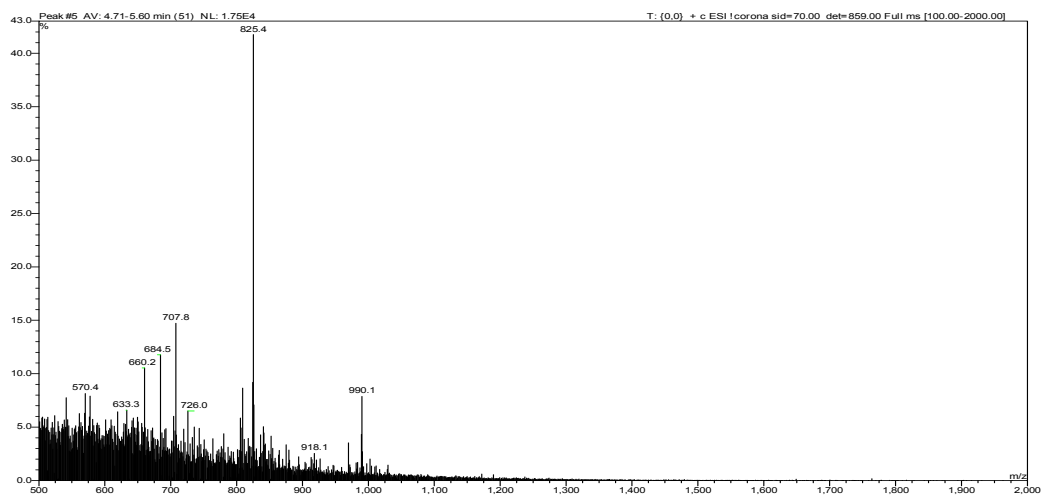

| (m/z)calad                 | (m/z)found                 |
|----------------------------|----------------------------|
| [M+5H] <sup>5+</sup> 988.9 | [M+5H] <sup>5+</sup> 990.1 |
| [M+6H] <sup>6+</sup> 824.3 | [M+6H] <sup>6+</sup> 825.4 |

23

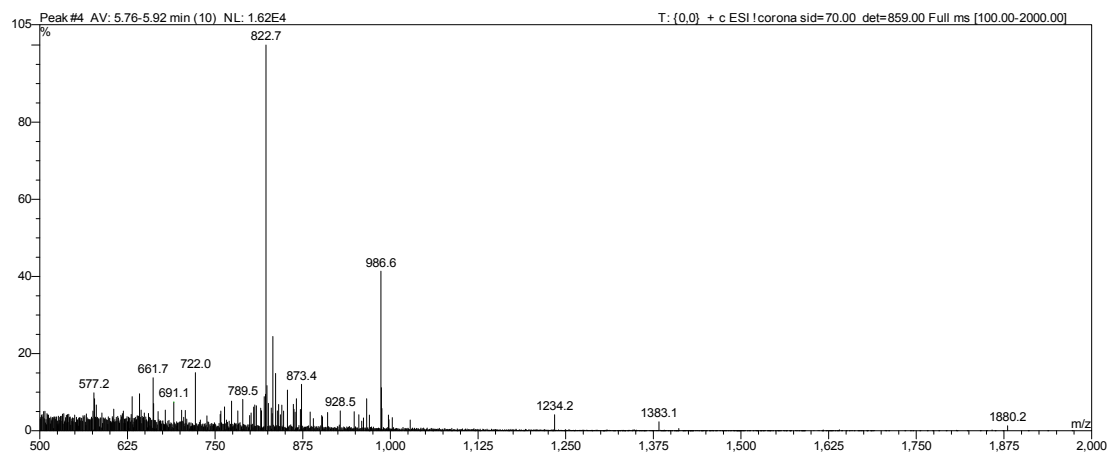

| (m/z)calad                 | (m/z)found                 |
|----------------------------|----------------------------|
| [M+5H] <sup>5+</sup> 985.9 | [M+5H] <sup>5+</sup> 986.6 |
| [M+6H] <sup>6+</sup> 821.8 | [M+6H] <sup>6+</sup> 822.7 |

# Supporting Information

24

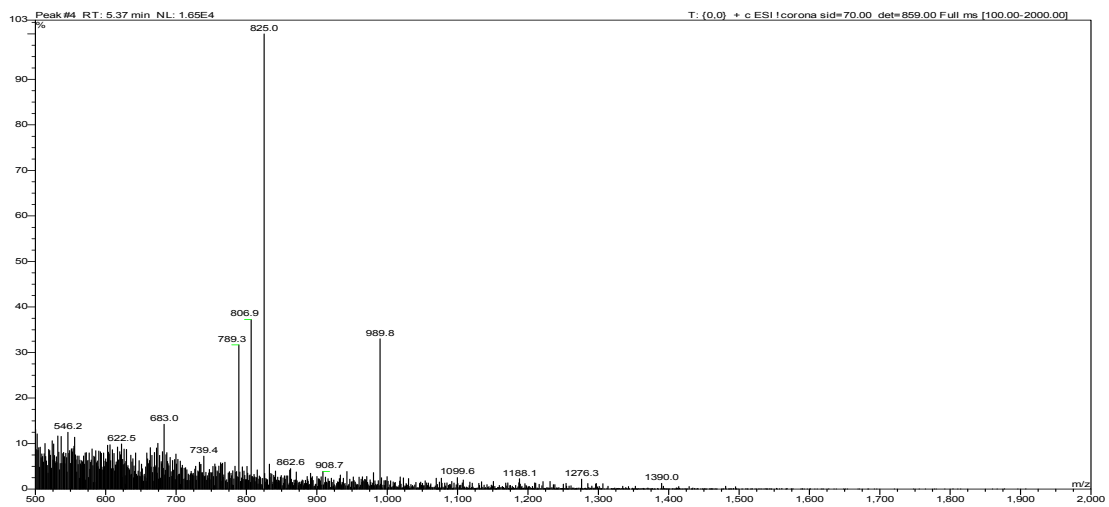

| (m/z)calad          | (m/z)found          |
|---------------------|---------------------|
| $[M+5H]^{5+}$ 988.9 | $[M+5H]^{5+}$ 989.8 |
| $[M+6H]^{6+}$ 824.3 | $[M+6H]^{6+}$ 825.0 |

## Characterization of PEGylated conjugates 25–36

25

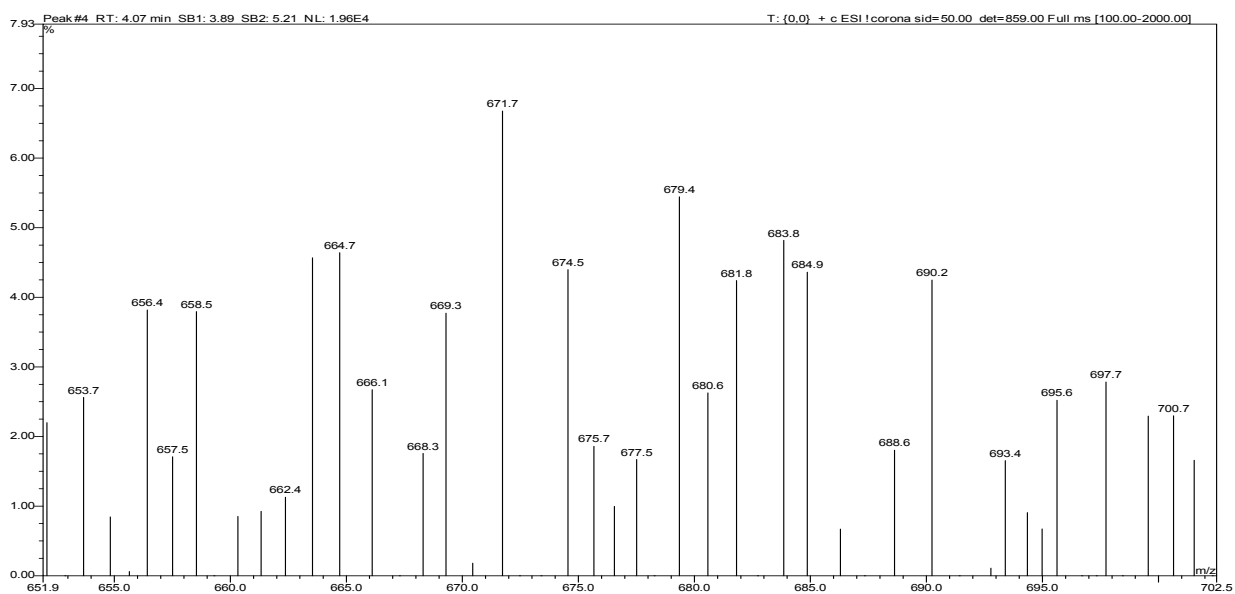

|    | (m/z)calad          |                        | (m/z)found          |                        |
|----|---------------------|------------------------|---------------------|------------------------|
| 18 | $[m+9H]^{9+}$ 661.2 | $[M+8H+Na]^{9+}$ 663.6 | $[m+9H]^{9+}$ 661.2 | $[M+8H+Na]^{9+}$ 663.6 |
| 19 | $[m+9H]^{9+}$ 666.1 | $[M+8H+Na]^{9+}$ 668.5 | $[m+9H]^{9+}$ 666.1 | $[M+8H+Na]^{9+}$ 668.3 |
| 20 | $[m+9H]^{9+}$ 671.0 | $[M+8H+Na]^{9+}$ 673.4 | $[m+9H]^{9+}$ 671.7 | $[M+8H+Na]^{9+}$ 674.5 |
| 21 | $[m+9H]^{9+}$ 675.9 | $[M+8H+Na]^{9+}$ 678.3 | $[m+9H]^{9+}$ 676.5 | $[M+8H+Na]^{9+}$ 679.4 |
| 22 | $[m+9H]^{9+}$ 680.8 | $[M+8H+Na]^{9+}$ 683.2 | $[m+9H]^{9+}$ 680.6 | $[M+8H+Na]^{9+}$ 683.8 |

## Supporting Information

26

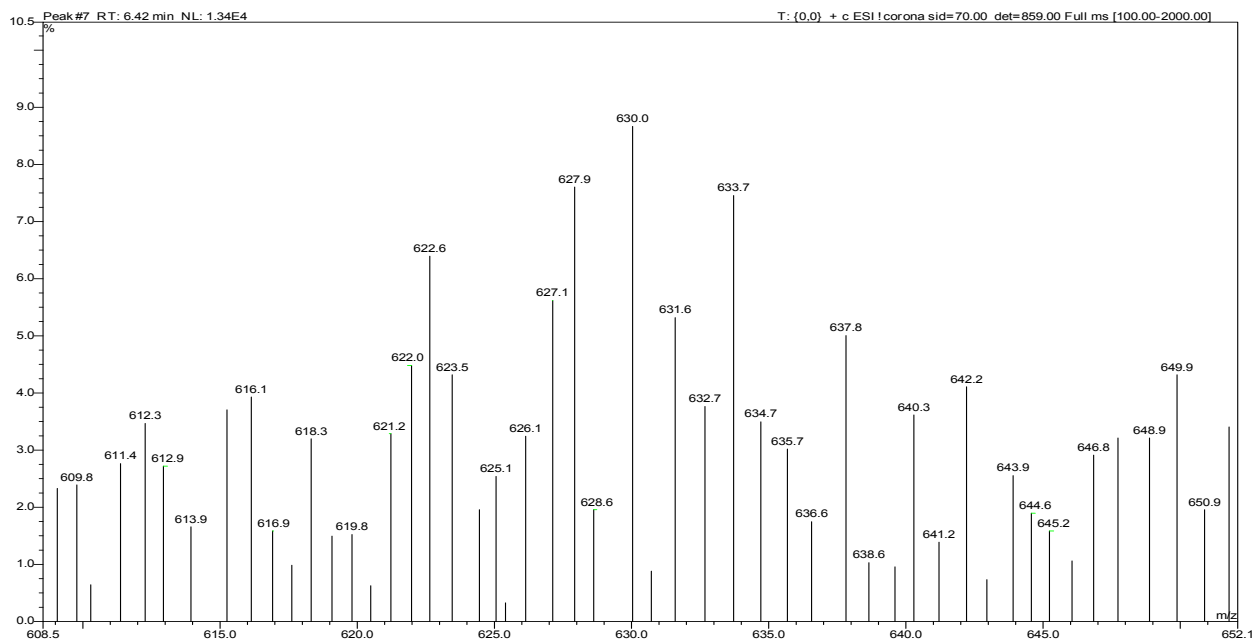

|    | (m/z)calad            |                          | (m/z)found            |                          |
|----|-----------------------|--------------------------|-----------------------|--------------------------|
| 38 | $[m+11H]^{11+}$ 621.2 | $[M+10H+Na]^{11+}$ 623.2 | $[m+11H]^{11+}$ 621.2 | $[M+10H+Na]^{11+}$ 623.5 |
| 39 | $[m+11H]^{11+}$ 625.2 | $[M+10H+Na]^{11+}$ 627.2 | $[m+11H]^{11+}$ 625.3 | $[M+10H+Na]^{11+}$ 627.1 |
| 40 | $[m+11H]^{11+}$ 629.2 | $[M+10H+Na]^{11+}$ 631.2 | $[m+11H]^{11+}$ 630.0 | $[M+10H+Na]^{11+}$ 631.6 |
| 41 | $[m+11H]^{11+}$ 633.2 | $[M+10H+Na]^{11+}$ 635.2 | $[m+11H]^{11+}$ 633.7 | $[M+10H+Na]^{11+}$ 635.7 |
| 42 | $[m+11H]^{11+}$ 637.2 | $[M+10H+Na]^{11+}$ 639.2 | $[m+11H]^{11+}$ 637.8 | $[M+10H+Na]^{11+}$ 639.6 |



# Supporting Information

27

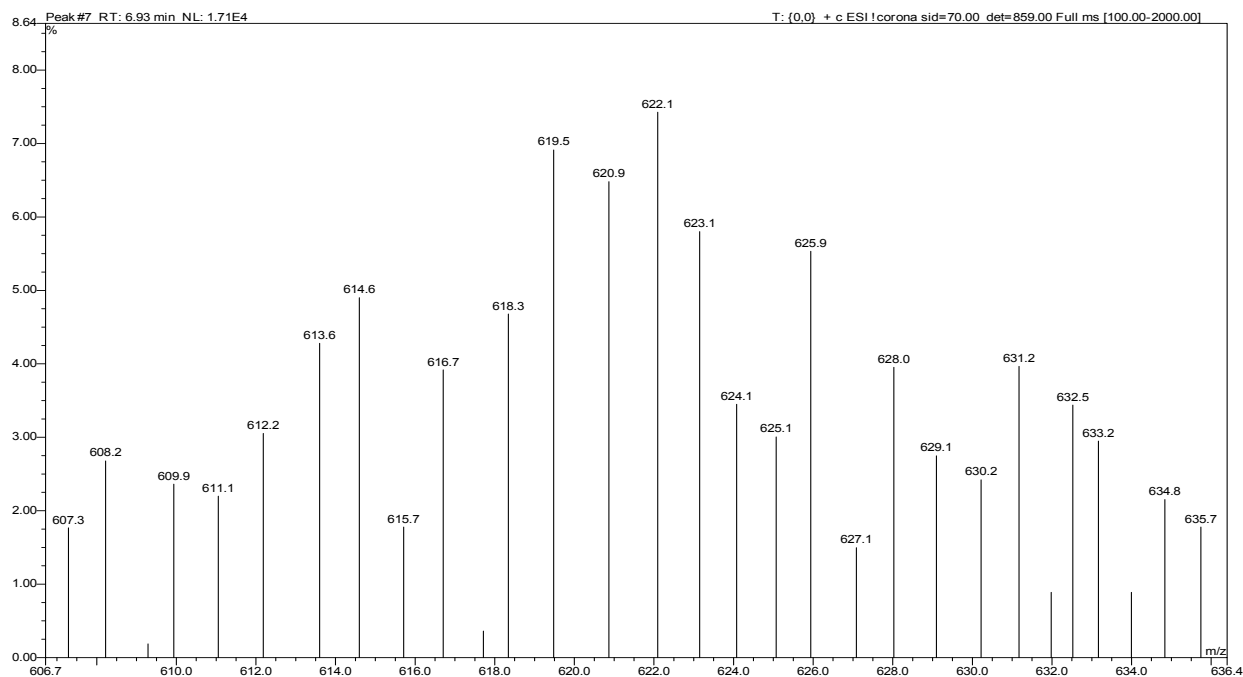

|     | (m/z)calad            |                          | (m/z)found            |                          |
|-----|-----------------------|--------------------------|-----------------------|--------------------------|
| 106 | $[m+16H]^{16+}$ 614.4 | $[M+15H+Na]^{16+}$ 615.7 | $[m+16H]^{16+}$ 614.6 | $[M+15H+Na]^{16+}$ 615.7 |
| 107 | $[m+16H]^{16+}$ 617.1 | $[M+15H+Na]^{16+}$ 618.5 | $[m+16H]^{16+}$ 617.7 | $[M+15H+Na]^{16+}$ 618.3 |
| 108 | $[m+16H]^{16+}$ 619.9 | $[M+15H+Na]^{16+}$ 621.2 | $[m+16H]^{16+}$ 619.5 | $[M+15H+Na]^{16+}$ 622.1 |
| 109 | $[m+16H]^{16+}$ 622.6 | $[M+15H+Na]^{16+}$ 624.0 | $[m+16H]^{16+}$ 623.1 | $[M+15H+Na]^{16+}$ 624.1 |
| 110 | $[m+16H]^{16+}$ 625.4 | $[M+15H+Na]^{16+}$ 626.7 | $[m+16H]^{16+}$ 625.9 | $[M+15H+Na]^{16+}$ 627.1 |

## Supporting Information

28

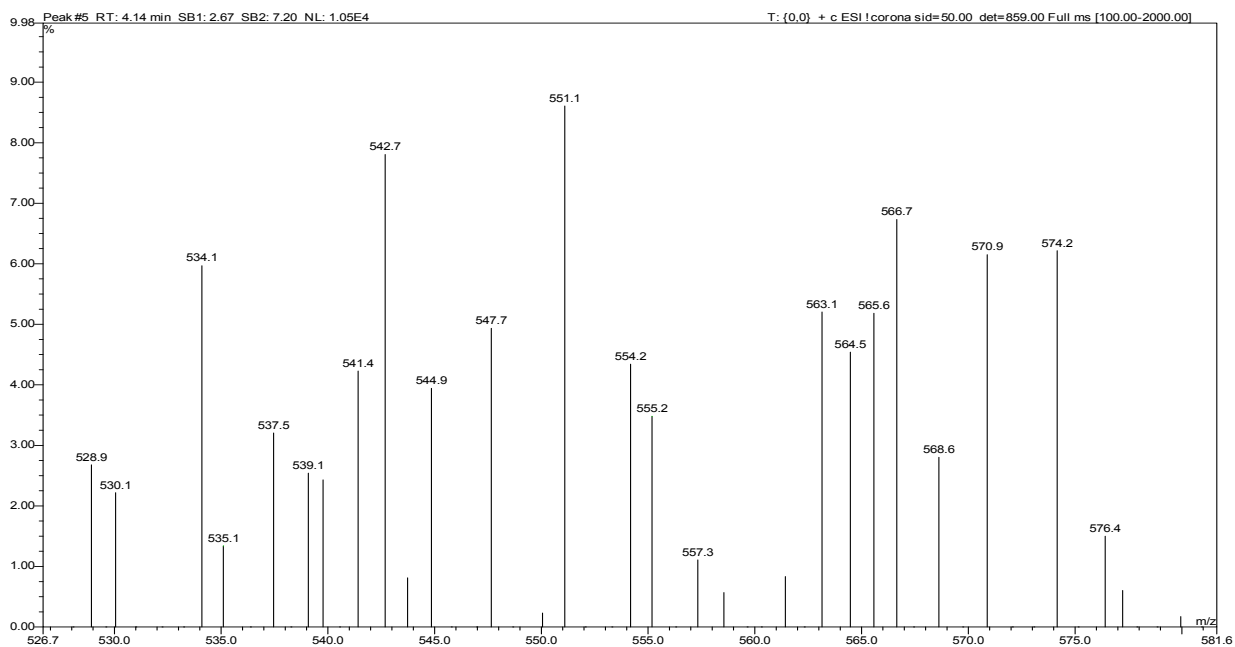

|    | (m/z)calad            |                          | (m/z)found            |                              |
|----|-----------------------|--------------------------|-----------------------|------------------------------|
| 18 | $[m+11H]^{11+}$ 542.6 | $[M+10H+Na]^{11+}$ 544.6 | $[m+11H]^{11+}$ 542.7 | $[M+10H+Na]^{11+}$ 544.9     |
| 19 | $[m+11H]^{11+}$ 546.6 | $[M+10H+Na]^{11+}$ 548.6 | $[m+11H]^{11+}$ 547.7 | $[M+10H+Na]^{11+}$ not found |
| 20 | $[m+11H]^{11+}$ 550.6 | $[M+10H+Na]^{11+}$ 552.6 | $[m+11H]^{11+}$ 551.1 | $[M+10H+Na]^{11+}$ not found |
| 21 | $[m+11H]^{11+}$ 554.6 | $[M+10H+Na]^{11+}$ 556.6 | $[m+11H]^{11+}$ 555.2 | $[M+10H+Na]^{11+}$ 557.3     |
| 22 | $[m+11H]^{11+}$ 558.6 | $[M+10H+Na]^{11+}$ 560.6 | $[m+11H]^{11+}$ 558.5 | $[M+10H+Na]^{11+}$ 561.4     |

# Supporting Information

29

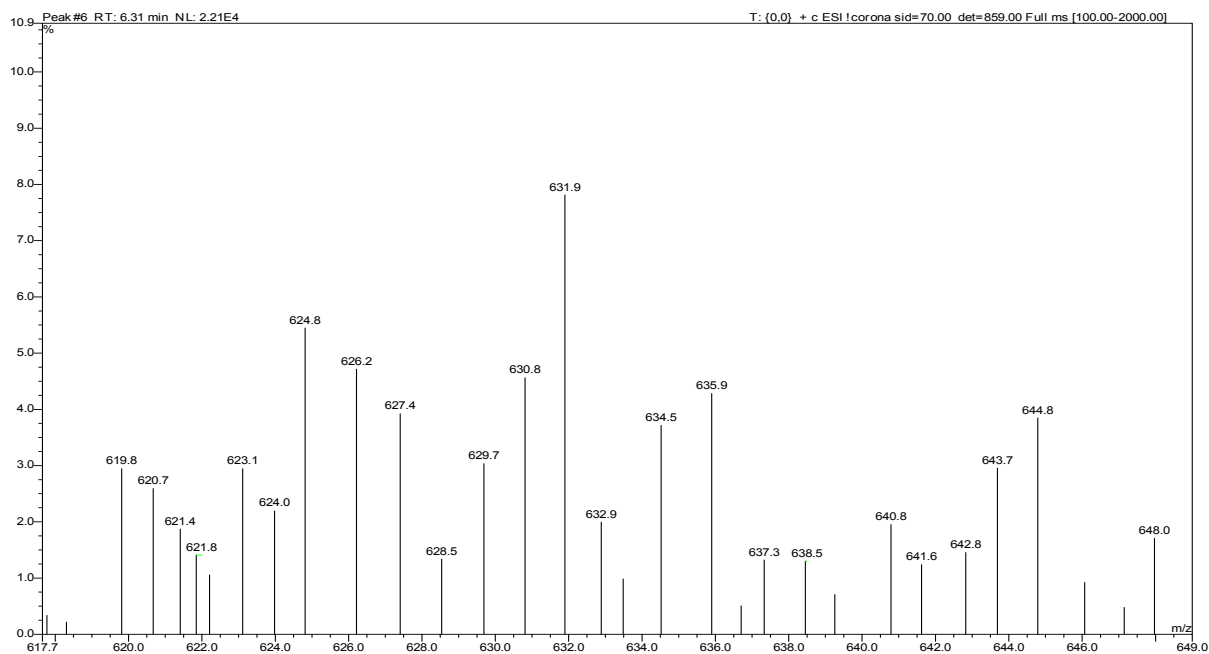

|    | (m/z)calad            |                          | (m/z)found            |                          |
|----|-----------------------|--------------------------|-----------------------|--------------------------|
| 38 | $[m+11H]^{11+}$ 622.6 | $[M+10H+Na]^{11+}$ 624.6 | $[m+11H]^{11+}$ 623.1 | $[M+10H+Na]^{11+}$ 624.8 |
| 39 | $[m+11H]^{11+}$ 626.6 | $[M+10H+Na]^{11+}$ 628.6 | $[m+11H]^{11+}$ 626.2 | $[M+10H+Na]^{11+}$ 628.5 |
| 40 | $[m+11H]^{11+}$ 630.6 | $[M+10H+Na]^{11+}$ 632.6 | $[m+11H]^{11+}$ 630.8 | $[M+10H+Na]^{11+}$ 632.9 |
| 41 | $[m+11H]^{11+}$ 634.6 | $[M+10H+Na]^{11+}$ 636.6 | $[m+11H]^{11+}$ 634.5 | $[M+10H+Na]^{11+}$ 636.7 |
| 42 | $[m+11H]^{11+}$ 638.6 | $[M+10H+Na]^{11+}$ 640.6 | $[m+11H]^{11+}$ 638.5 | $[M+10H+Na]^{11+}$ 640.8 |

# Supporting Information

30

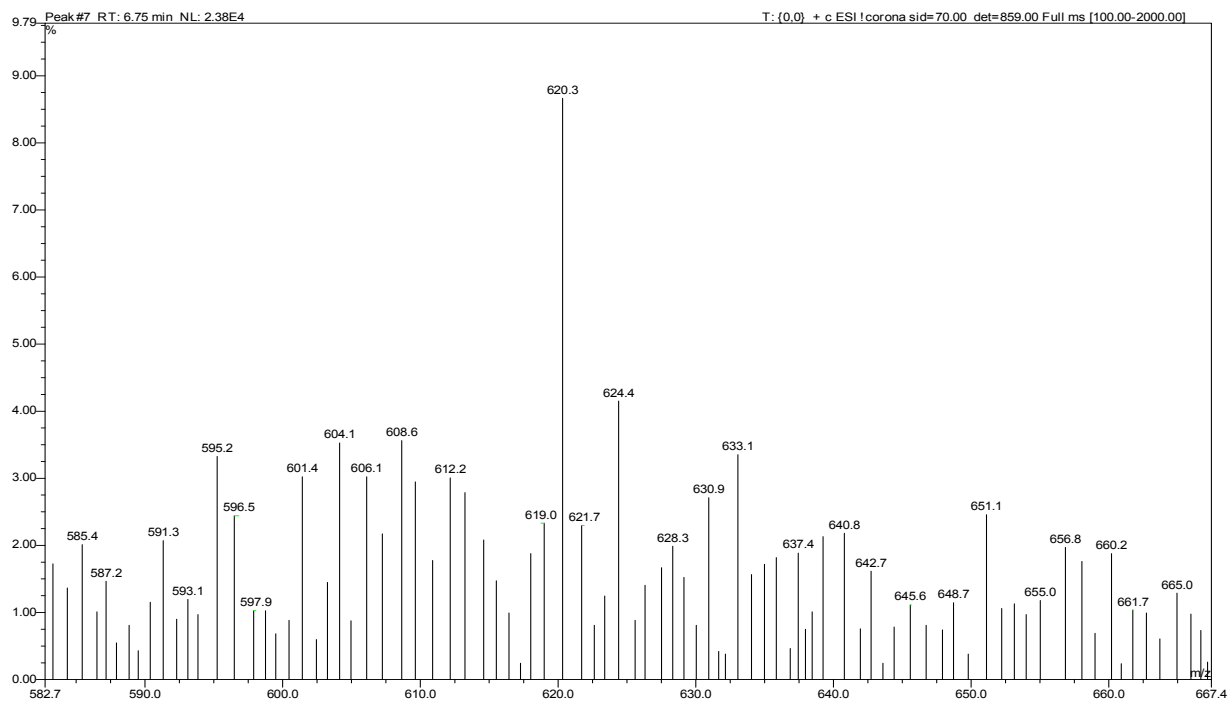

|     | (m/z)calad                   |                                 | (m/z)found                   |                                 |
|-----|------------------------------|---------------------------------|------------------------------|---------------------------------|
| 106 | [m+16H] <sup>16+</sup> 615.4 | [M+15H+Na] <sup>16+</sup> 616.7 | [m+16H] <sup>16+</sup> 615.5 | [M+15H+Na] <sup>16+</sup> 616.6 |
| 107 | [m+16H] <sup>16+</sup> 618.1 | [M+15H+Na] <sup>16+</sup> 619.5 | [m+16H] <sup>16+</sup> 618.0 | [M+15H+Na] <sup>16+</sup> 620.3 |
| 108 | [m+16H] <sup>16+</sup> 620.9 | [M+15H+Na] <sup>16+</sup> 622.2 | [m+16H] <sup>16+</sup> 621.7 | [M+15H+Na] <sup>16+</sup> 622.8 |
| 109 | [m+16H] <sup>16+</sup> 623.6 | [M+15H+Na] <sup>16+</sup> 625.0 | [m+16H] <sup>16+</sup> 624.4 | [M+15H+Na] <sup>16+</sup> 625.2 |
| 110 | [m+16H] <sup>16+</sup> 626.4 | [M+15H+Na] <sup>16+</sup> 627.7 | [m+16H] <sup>16+</sup> 626.4 | [M+15H+Na] <sup>16+</sup> 627.5 |

# Supporting Information

31

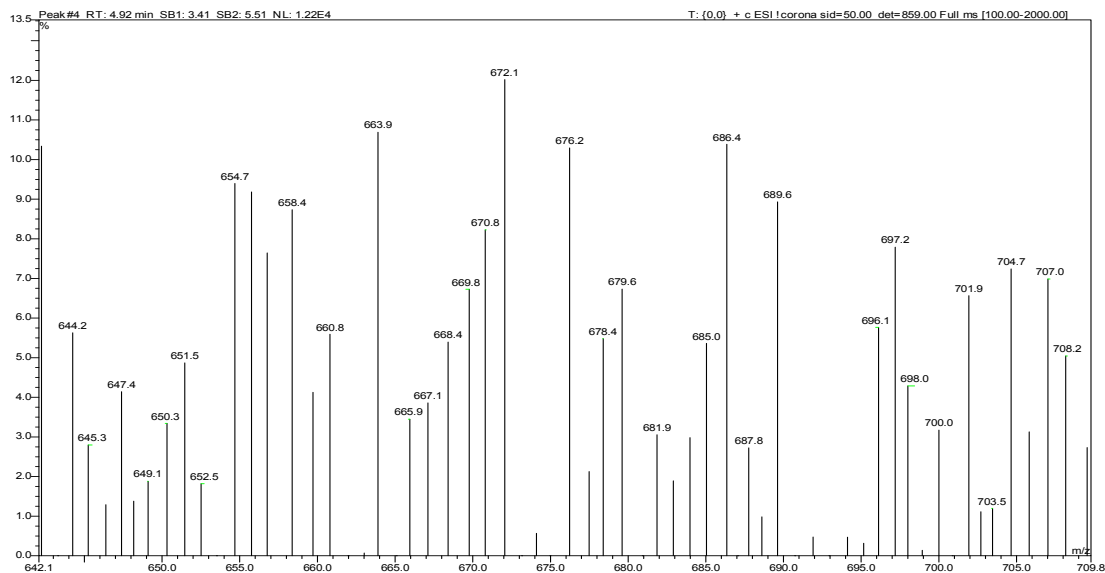

|    | (m/z)calad          |                        | (m/z)found          |                        |
|----|---------------------|------------------------|---------------------|------------------------|
| 18 | $[m+9H]^{9+}$ 661.3 | $[M+8H+Na]^{9+}$ 663.7 | $[m+9H]^{9+}$ 660.8 | $[M+8H+Na]^{9+}$ 663.9 |
| 19 | $[m+9H]^{9+}$ 666.2 | $[M+8H+Na]^{9+}$ 668.6 | $[m+9H]^{9+}$ 667.1 | $[M+8H+Na]^{9+}$ 668.4 |
| 20 | $[m+9H]^{9+}$ 671.1 | $[M+8H+Na]^{9+}$ 673.5 | $[m+9H]^{9+}$ 672.1 | $[M+8H+Na]^{9+}$ 674.1 |
| 21 | $[m+9H]^{9+}$ 676.0 | $[M+8H+Na]^{9+}$ 678.4 | $[m+9H]^{9+}$ 676.2 | $[M+8H+Na]^{9+}$ 678.4 |
| 22 | $[m+9H]^{9+}$ 680.9 | $[M+8H+Na]^{9+}$ 683.3 | $[m+9H]^{9+}$ 681.9 | $[M+8H+Na]^{9+}$ 684.0 |

# Supporting Information

32

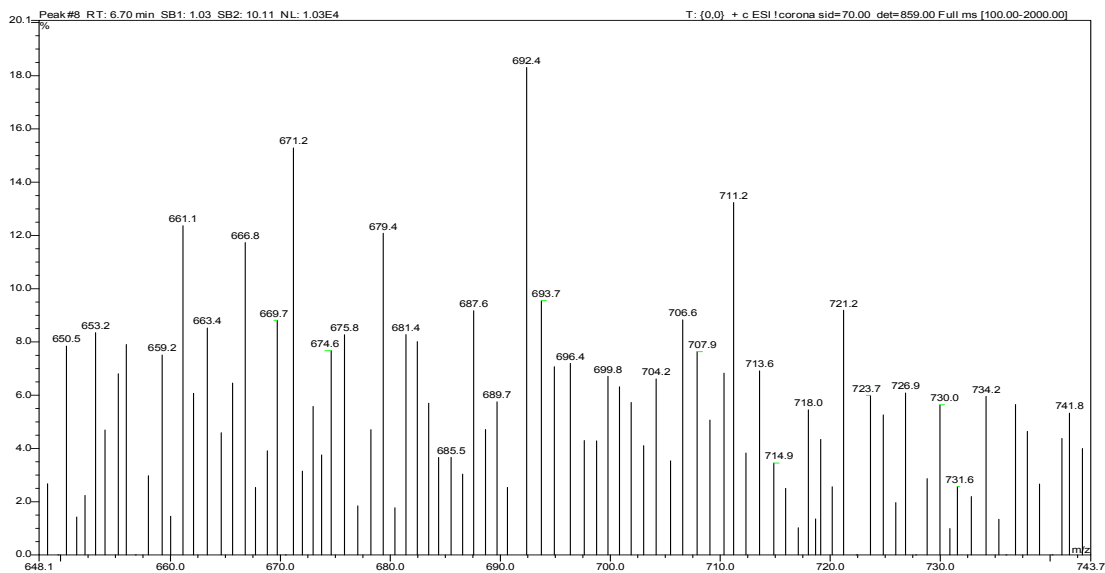

|    | (m/z)calad            |                         | (m/z)found            |                         |
|----|-----------------------|-------------------------|-----------------------|-------------------------|
| 38 | $[m+10H]^{10+}$ 683.3 | $[M+9H+Na]^{10+}$ 685.5 | $[m+10H]^{10+}$ 683.9 | $[M+9H+Na]^{10+}$ 685.5 |
| 39 | $[m+10H]^{10+}$ 687.7 | $[M+9H+Na]^{10+}$ 689.9 | $[m+10H]^{10+}$ 687.6 | $[M+9H+Na]^{10+}$ 689.7 |
| 40 | $[m+10H]^{10+}$ 692.1 | $[M+9H+Na]^{10+}$ 694.3 | $[m+10H]^{10+}$ 692.4 | $[M+9H+Na]^{10+}$ 694.9 |
| 41 | $[m+10H]^{10+}$ 696.5 | $[M+9H+Na]^{10+}$ 698.7 | $[m+10H]^{10+}$ 696.4 | $[M+9H+Na]^{10+}$ 698.8 |
| 42 | $[m+10H]^{10+}$ 700.9 | $[M+9H+Na]^{10+}$ 703.1 | $[m+10H]^{10+}$ 700.6 | $[M+9H+Na]^{10+}$ 703.2 |

33

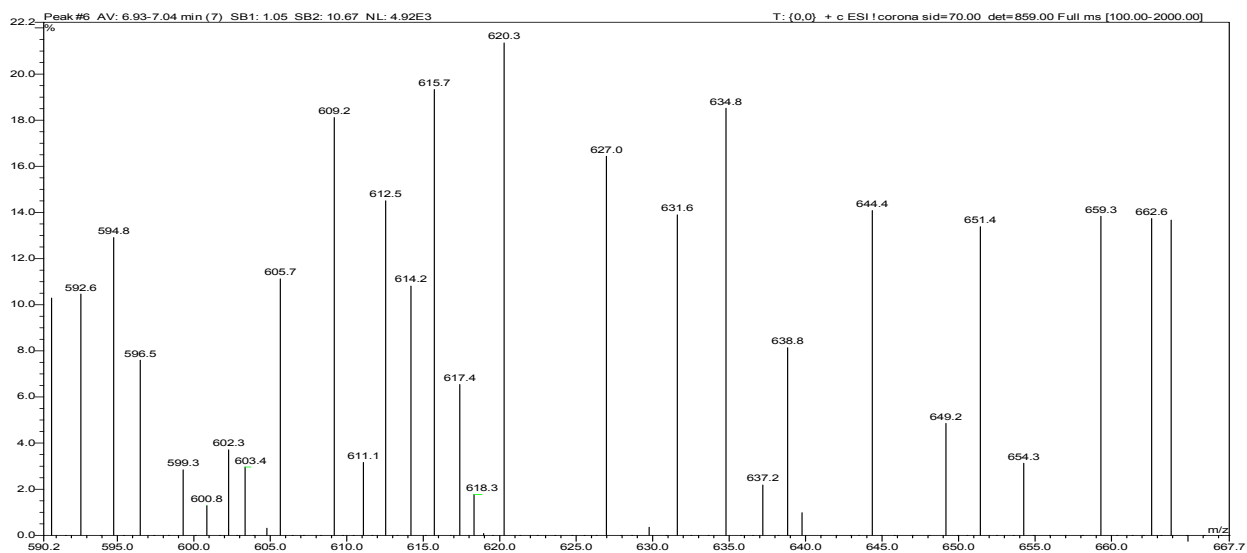

|            | (m/z)calad            |                          | (m/z)found                |                              |
|------------|-----------------------|--------------------------|---------------------------|------------------------------|
| <b>106</b> | $[m+16H]^{16+}$ 614.4 | $[M+15H+Na]^{16+}$ 615.8 | $[m+16H]^{16+}$ 614.2     | $[M+15H+Na]^{16+}$ 615.7     |
| <b>107</b> | $[m+16H]^{16+}$ 617.2 | $[M+15H+Na]^{16+}$ 618.5 | $[m+16H]^{16+}$ 617.4     | $[M+15H+Na]^{16+}$ 618.3     |
| <b>108</b> | $[m+16H]^{16+}$ 619.9 | $[M+15H+Na]^{16+}$ 621.3 | $[m+16H]^{16+}$ 620.3     | $[M+15H+Na]^{16+}$ not found |
| <b>109</b> | $[m+16H]^{16+}$ 622.7 | $[M+15H+Na]^{16+}$ 624.0 | $[m+16H]^{16+}$ not found | $[M+15H+Na]^{16+}$ not found |
| <b>110</b> | $[m+16H]^{16+}$ 625.4 | $[M+15H+Na]^{16+}$ 626.8 | $[m+16H]^{16+}$ not found | $[M+15H+Na]^{16+}$ 627.0     |

# Supporting Information

34

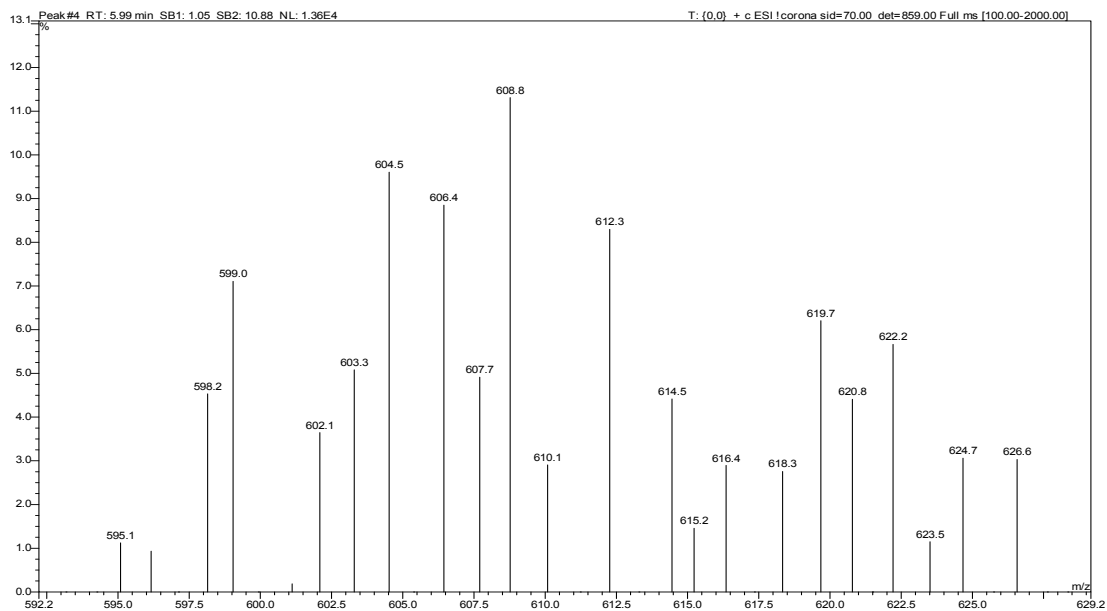

|    | (m/z)calad            |                         | (m/z)found            |                        |
|----|-----------------------|-------------------------|-----------------------|------------------------|
| 18 | $[m+10H]^{10+}$ 596.8 | $[M+9H+Na]^{10+}$ 599.0 | $[m+10H]^{10+}$ 596.3 | $[M+9H+Na]^{9+}$ 599.0 |
| 19 | $[m+10H]^{10+}$ 601.2 | $[M+9H+Na]^{10+}$ 603.4 | $[m+10H]^{10+}$ 601.1 | $[M+9H+Na]^{9+}$ 603.3 |
| 20 | $[m+10H]^{10+}$ 605.6 | $[M+9H+Na]^{10+}$ 607.8 | $[m+10H]^{10+}$ 606.4 | $[M+9H+Na]^{9+}$ 608.8 |
| 21 | $[m+10H]^{10+}$ 610.0 | $[M+9H+Na]^{10+}$ 612.2 | $[m+10H]^{10+}$ 610.1 | $[M+9H+Na]^{9+}$ 612.3 |
| 22 | $[m+10H]^{10+}$ 614.4 | $[M+9H+Na]^{10+}$ 616.6 | $[m+10H]^{10+}$ 614.5 | $[M+9H+Na]^{9+}$ 616.4 |



# Supporting Information

35

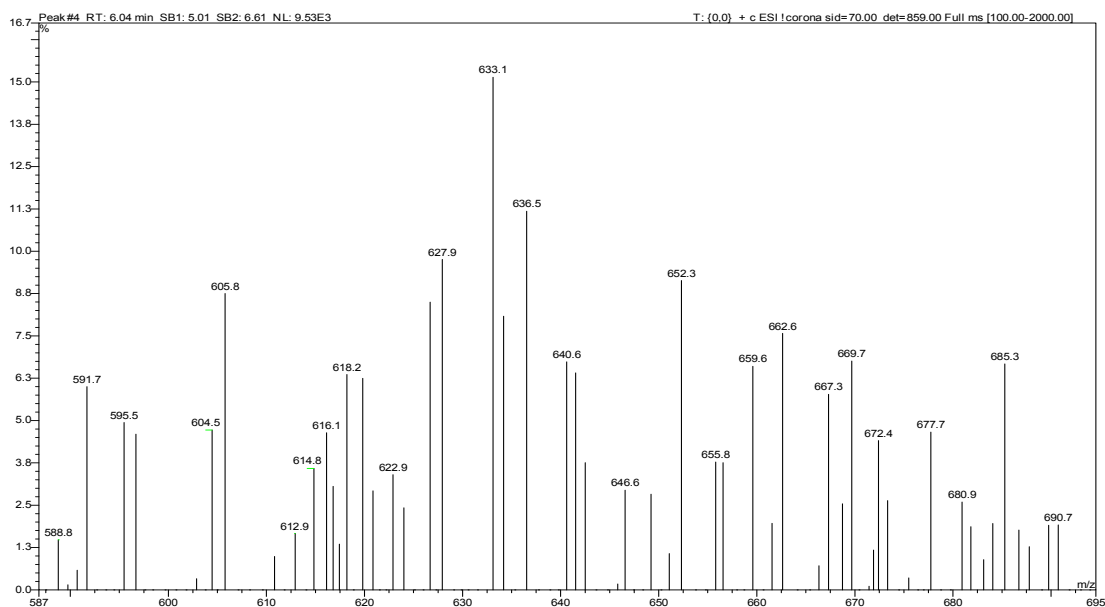

|    | (m/z)calad            |                          | (m/z)found                |                              |
|----|-----------------------|--------------------------|---------------------------|------------------------------|
| 38 | $[m+11H]^{11+}$ 622.6 | $[M+10H+Na]^{11+}$ 624.6 | $[m+11H]^{11+}$ 622.9     | $[M+10H+Na]^{11+}$ 624.3     |
| 39 | $[m+11H]^{11+}$ 626.6 | $[M+10H+Na]^{11+}$ 628.6 | $[m+11H]^{11+}$ 626.9     | $[M+10H+Na]^{11+}$ not found |
| 40 | $[m+11H]^{11+}$ 630.6 | $[M+10H+Na]^{11+}$ 632.6 | $[m+11H]^{11+}$ not found | $[M+10H+Na]^{11+}$ 633.1     |
| 41 | $[m+11H]^{11+}$ 634.6 | $[M+10H+Na]^{11+}$ 636.6 | $[m+11H]^{11+}$ 634.5     | $[M+10H+Na]^{11+}$ 636.5     |
| 42 | $[m+11H]^{11+}$ 638.6 | $[M+10H+Na]^{11+}$ 640.6 | $[m+11H]^{11+}$ not found | $[M+10H+Na]^{11+}$ 640.6     |

# Supporting Information

36

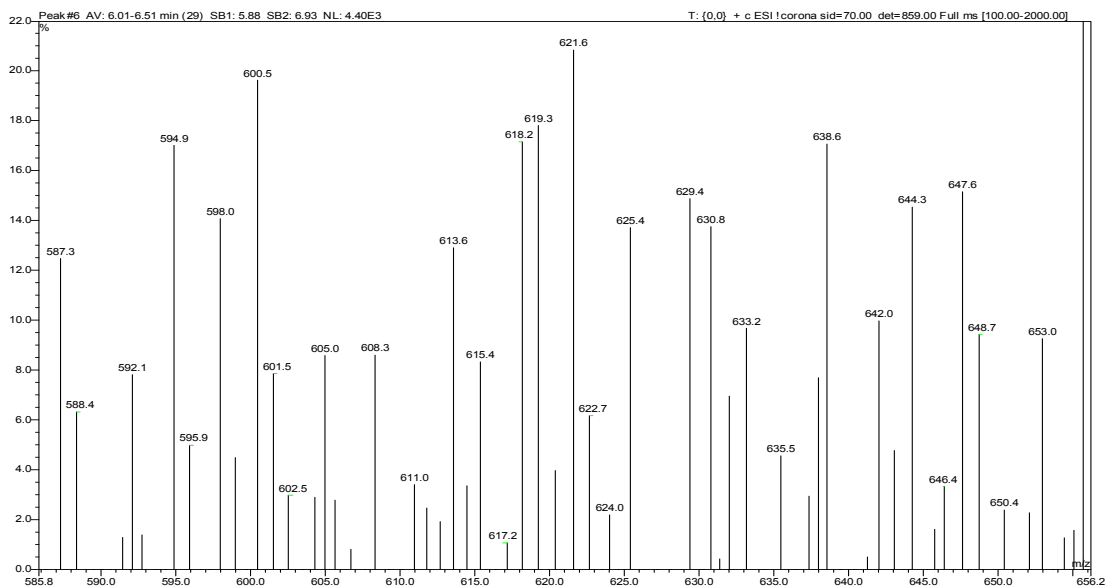

|            | (m/z)calad            |                          | (m/z)found                |                              |
|------------|-----------------------|--------------------------|---------------------------|------------------------------|
| <b>106</b> | $[m+16H]^{16+}$ 615.4 | $[M+15H+Na]^{16+}$ 616.7 | $[m+16H]^{16+}$ 615.4     | $[M+15H+Na]^{16+}$ 617.2     |
| <b>107</b> | $[m+16H]^{16+}$ 618.1 | $[M+15H+Na]^{16+}$ 619.5 | $[m+16H]^{16+}$ 618.2     | $[M+15H+Na]^{16+}$ 619.3     |
| <b>108</b> | $[m+16H]^{16+}$ 620.9 | $[M+15H+Na]^{16+}$ 622.2 | $[m+16H]^{16+}$ 621.6     | $[M+15H+Na]^{16+}$ 622.7     |
| <b>109</b> | $[m+16H]^{16+}$ 623.6 | $[M+15H+Na]^{16+}$ 625.0 | $[m+16H]^{16+}$ 624.0     | $[M+15H+Na]^{16+}$ 625.4     |
| <b>110</b> | $[m+16H]^{16+}$ 626.4 | $[M+15H+Na]^{16+}$ 627.7 | $[m+16H]^{16+}$ not found | $[M+15H+Na]^{16+}$ not found |

## Supporting Information

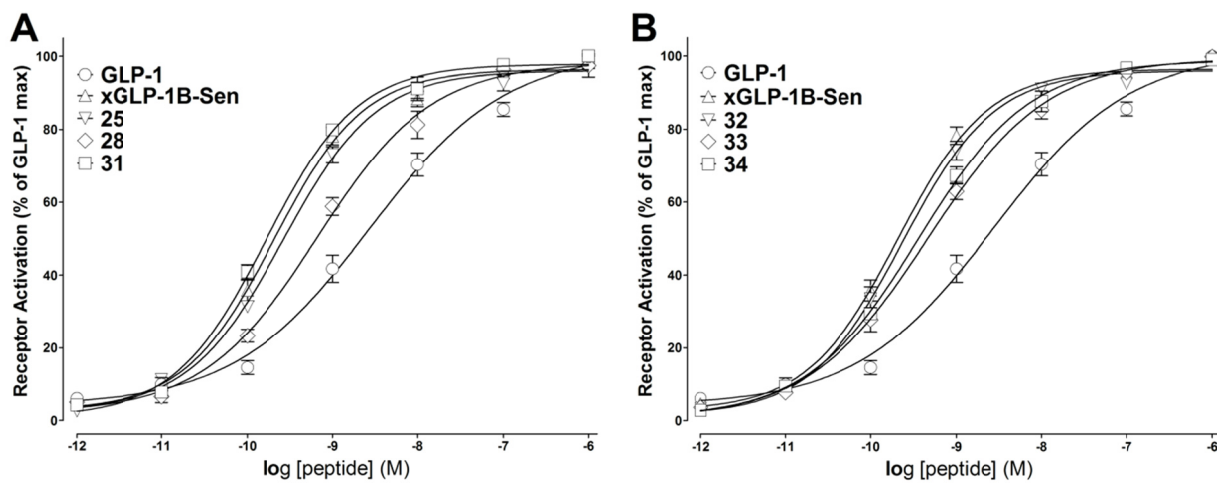

**Figure S1.** The representative concentration response curves of hGLP-1 and PEGylated conjugates. The data for the test peptides were normalized and plotted as the percentage of the response stimulated by saturating GLP-1 (1000 nM).

## Supporting Information

**Table S1.** Time table of in vivo IPGTT and OGTT tests

| Entry | Test                          | Mice              |   | Peptides        |                                  |                      | Glucose     |               | Blood collection                                                                      |
|-------|-------------------------------|-------------------|---|-----------------|----------------------------------|----------------------|-------------|---------------|---------------------------------------------------------------------------------------|
|       |                               | Type              | n | Fasted time (h) | Dose (nmol/kg)                   | Treatment time (min) | Dose (g/kg) | Load time (h) |                                                                                       |
| 1     | acute IPGTT                   | KM mice           | 6 | 12              | 25                               | -10                  | 2           | 0             | -10, 0, 15, 30, 60, 120 min                                                           |
| 2     | IPGTT                         | <i>db/db</i> mice | 6 | 18              | 25                               | -30                  | 1           | 0             | -30, 0, 15, 30, 60, 120 min                                                           |
| 3     | pre-OGTT                      | <i>db/db</i> mice | 6 | 18              |                                  | -120                 | 1.5         | 0             | -120, 0, 30, 60, 90, 120 min                                                          |
| 4     | pre-OGTT                      | <i>db/db</i> mice | 6 | 18              | 25 ( <b>33</b> and lixisenatide) | -360                 | 1.5         | 0             | -360, 0, 30, 60, 90, 120 min                                                          |
| 5     | multiple-OGTT                 | <i>db/db</i> mice | 6 | 18              | or 100 ( <b>33</b> )             | -30                  | 1.5         | 0, 6, 12      | -0.5, 0, 0.25, 0.5, 1, 2, 3, 6, 6.25, 6.5, 7, 8, 9, 12, 12.25, 12.5, 13, 14, 15, 18 h |
| 6     | IPGTT after chronic treatment | <i>db/db</i> mice | 6 | 18              | /                                | /                    | 1           | 0             | 0, 15, 30, 60, 120 min                                                                |
